# Supplementary material
Source: publisher figshare collection journal article supplement (https://springernature.figshare.com/ndownloader/files/22332144)
Supplement: Supplementary file 1 [file 22332144]

## Sheet: Sheet1
	Additional file 3 Raw data of magnetic susceptibilities of sandstone blocks used for the bridge construction along the East Road Road
	Bridge No.	2494	3708	3706	213	7397	7081	2495	2496	3705	3707	1600	3701	1599	225	319	318	2498	3703	3702	306	1974	5426	1025	2695	466
	M.S. (10-3 SI unit)	0.4	0.57	0.19	0.25	1.43	2.27	2.57	2.85	-	0.223	-	-	3.04	3.11	1.7	2.15	-	0.112	1.09	3.29	0.416	2.36	1.01	4.78	3.87
		0.25	2.21	0.26	0.21	2.04	2.66	2.32	2.27	-	2.13	-	-	5.4	1.72	0.81	0.555	-	1.04	1.04	2.09	0.838	1.01	0.875	2.43	1.71
		0.43	0.45	0.15	0.23	1.59	2.43	2.13	1.06	-	2.56	-	-	4.14	1.63	0.14	0.175	-	0.973	0.847	0.384	0.388	0.93	2	4.38	1.05
		0.21	4.11	0.57	0.23	3.19	1.9	2.84	2.52	-	4.17	-	-	4.26	1.74	1.3	0.17	-	1.14		2.64	0.582	1.31		0.81	2.09
		0.24	0.51	0.56	0.18	1.2	1.85	2.53	2.57	-	1.79	-	-	4.27	0.186	0.767	1.15	-	0.721		2.34	0.836	0.984			1.15
		0.54	0.42	0.19	0.29	2.13	2.21	2.63	1.58	-	0.536	-	-	2.1	1.45	2.18	1.32	-	2.37		1.85	1.1	1.59			0.262
		0.2	0.59	0.23	0.37	2.15	2.19	3.38	1.31	-	0.485	-	-	3.94	1.43	1.6	1.78	-	1.03		1.12	0.82	0.387			0.644
		0.28	0.49	0.24	0.27	0.34	1.36	5.27	3.47	-	1.2	-	-	5.33	1.89	0.595	1.71	-	2.9		2.88	1.39	1.38			2.9
		0.24	0.26	0.23	0.33	1.6	2.36	4.79	2.86	-	1.37	-	-	1.01	1.22	1.41	0.981	-	0.752		1.28	3.89	0.882			1.12
		0.28	0.22	0.15	0.36	1.65	2.06	4.97	2.15	-	3.08	-	-	3.43	1.7	1.46	1.65	-	2.53		1.43	0.56	0.551			0.724
		0.24	0.55	0.27	0.29	1.91	4.67	3.37	3.38	-	1.26	-	-	6	0.157	2.66	0.172	-	4.83		1.99	0.7	0.382			1.21
		0.24	0.51	0.48	0.23	1.03	0.877	5.17	1.1	-	2.61	-	-	1.72	0.977	0.109	1.87	-	1.84		2.44	1.25	0.517			0.922
		0.27	0.38	0.14	0.19	1.28	2.27	2.86	1.89	-	4.15	-	-	1.79	2.63	1.47	1.08	-	1.07		2.24	0.52	0.953			0.527
		0.16	0.53		0.3	1.35	3.49	2.64	3.02	-	1.32	-	-	3.39	1.75	0.103	1.66	-	1.49		1.51	0.64	0.338			0.684
		0.37	0.24		0.22	1.24	4.35	4.67	1.8	-	0.52	-	-	1.7	1.44	0.366	1.37	-	1.83		0.448	0.748	1.2			2.72
	mean	0.29	0.802667	0.281538	0.263333	1.60867	2.46313	3.476	2.25533	-	1.82693	-	-	3.43467	1.53533	1.11133	1.1862	-	1.64187	0.992333	1.86213	0.978533	0.984933	1.295	3.1	1.43887
	median	0.25	0.51	0.23	0.25	1.59	2.27	2.86	2.27	-	1.37	-	-	3.43	1.63	1.3	1.32	-	1.14	1.04	1.99	0.748	0.953	1.01	3.405	1.12
	s.d.*	0.101489	1.02907	0.152526	0.0588784	0.643571	1.01197	1.15125	0.787345	-	1.27135	-	-	1.5269	0.761622	0.779062	0.657465	-	1.16211	0.128321	0.8383	0.855768	0.542942	0.614268	1.83973	1.0271
	*Standard deviation
